# Supplementary material
Source: PubMed Central journal article supplement (PMC218774)

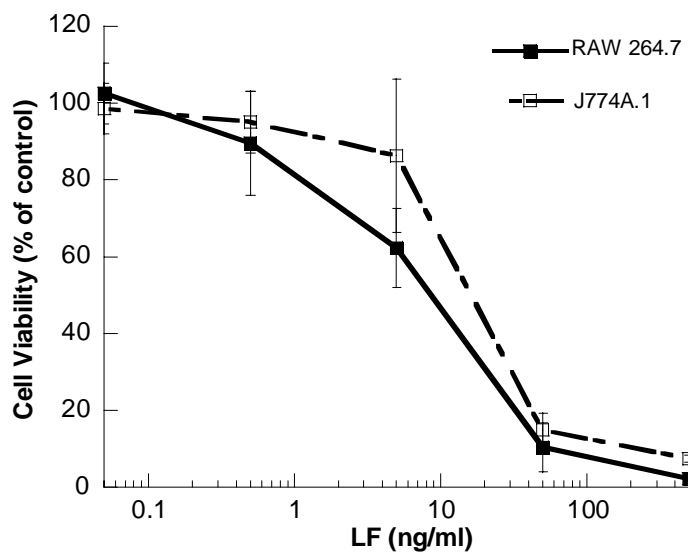

Supplement: pnas_2134042100_2.pdf [file pnas_2134042100_2.pdf]

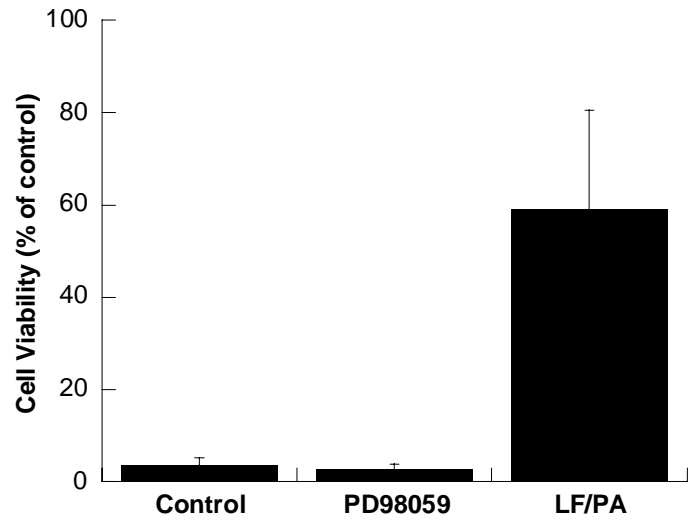

Supplement: pnas_2134042100_5.pdf [file pnas_2134042100_5.pdf]

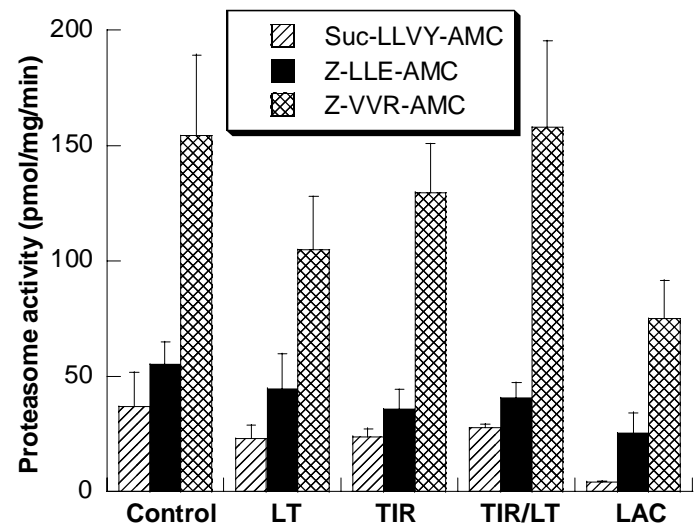

Supplement: pnas_2134042100_7.pdf [file pnas_2134042100_7.pdf]

TIR-RAW 264.7

RAW 264.7

| M | 0* | 24* | 48* | 1 | 3 | 6 | 10 | M | 24 | 48 | 0 | 0.5 | 1 | 1.5 | 1.5 | Time (h)         |
|---|----|-----|-----|---|---|---|----|---|----|----|---|-----|---|-----|-----|------------------|
|   | -  | +   | +   | + | + | + | +  |   | +  | +  | - | -   | - | -   | -   | Pretreat. (24 h) |
|   | -  | -   | -   | + | + | + | +  |   | +  | +  | - | +   | + | +   | -   | LT high dose     |

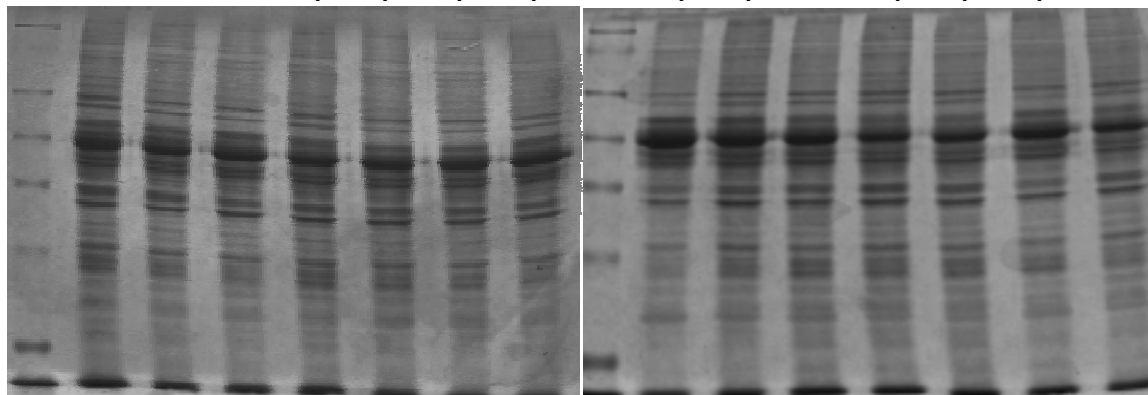

1 2 3 4 5 6 7 8 9 10 11 12 13 14 15 16

Supplement: pnas_2134042100_9.pdf [file pnas_2134042100_9.pdf]
